# Supplementary material for: Prevalent versus incident progressive supranuclear palsy: An analysis of the frequencies of neuropathological and clinical features at U.S. Alzheimer’s Disease Research Centers indicate a relatively common tauopathy of aging
Source: Research Square preprint supplement (doi:10.21203/rs.3.rs-10119056/v1), 2026-07-01
Supplement: Supplementary file 1 [file 501382352ff28ee2b74fb41e.docx]

| **Supplemental Table 1** Demographics and neuropathology of included participants, stratified by cognitive status at initial visit (including MCI cases) | | | | | |
| --- | --- | --- | --- | --- | --- |
| Variable | Initial visit Normal | Initial visit MCI | Initial visit Dementia | Overall | P-value: initial Normal vs initial Dementia |
| **Sample size (n)** | **1452** | **1084** | **4309** | **6845** | N/A |
| % Female | 59 | 39 | 43.5 | 46.1 | <0.0001 |
| % White | 94.6 | 95.3 | 93.4 | 94.0 | 0.11 |
| Age at initial visit (years) [SD] | 80.5 [9.0] | 77.1 [10.3] | 72.4 [11.1] | 74.8 [11.1] | <0.0001 |
| Age at death (years) [SD] | 88.0 [9.1] | 83.2 [10.4] | 76.7 [11.3] | 80.1 [11.7] | <0.0001 |
| # total visits (avg [SD]) | 6.2 [3.5] | 4.8 [2.7] | 3.2 [2.3] | 4.1 [2.9] | <0.0001 |
| % with initial visit only | 8.3 | 10.5 | 28.8 | 21.5 | <0.0001 |
| % dementia at last visit | 26.9 | 66.3 | 99.6 | 78.9 | <0.0001 |
| Median # of participants per ADRC | 24 | 20 | 88.5 | 152 | <0.0001 |

| **Supplemental Table 2** Select Alzheimer's disease neuropathologic changes (ADNC), stratified by cognitive status at initial visit (including MCI cases) | | | | | |
| --- | --- | --- | --- | --- | --- |
| Variable | Initial visit Normal | Initial visit MCI | Initial visit Dementia | Overall | P-value: initial Normal vs initial Dementia |
| **Sample size (n)** | **1452** | **1084** | **4309** | **6845** | N/A |
| % with high level ADNCa | 16.0 | 43.4 | 56.6 | 44.2 | <0.0001 |
| % with Thal A phase 5a | 18.0 | 36.5 | 49.5 | 39.3 | <0.0001 |
| % with frequent neuritic plaques | 19.8 | 37.0 | 54.4 | 44.3 | <0.0001 |
| % with Braak NFT stage 0 | 3.3 | 4.7 | 8.0 | 6.5 | <0.0001 |
| % with Braak NFT stage I | 11.4 | 7.5 | 6.8 | 7.9 |
| % with Braak NFT stage II | 19.9 | 11.4 | 6.7 | 10.2 |
| % with Braak NFT stage III | 19.8 | 13.5 | 6.4 | 10.3 |
| % with Braak NFT stage IV | 24.0 | 16.4 | 9.0 | 13.4 |
| % with Braak NFT stage V | 12.3 | 19.1 | 18.1 | 17.0 |
| % with Braak NFT stage VI | 7.6 | 24.4 | 42.4 | 32.2 |
| aEffective sample sizes: normal = 939, MCI = 710, dementia = 2169 | | | | | |

| **Supplemental Table 3** Frequencies of various tau pathologies (PSP, CBD, Pick's, argyrophilic grains, tangle-predominant disease, and FTLD-Tau in general), stratified by cognitive status at initial visit (including MCI cases) | | | | | |
| --- | --- | --- | --- | --- | --- |
| Variable | Initial visit Normal | Initial visit MCI | Initial visit Dementia | Overall | P-value: initially Normal vs Dementia |
| **Sample size (n)** | **1452** | **1084** | **4309** | **6845** | N/A |
| Percentage with PSP | 3.3 | 5.3 | 4.5 | 4.3 | 0.058 |
| Percentage with CBD | 0.7 | 1.5 | 3.3 | 2.5 | <0.0001 |
| Percentage with Pick’s disease | 0.1 | 1.1 | 3.0 | 2.1 | <0.0001 |
| **Subsample size (n)a** | **929** | **695** | **2148** | **3772** | N/A |
| Percentage with argyrophilic grains (NPFTDT5)a | 12.2 | 5.0 | 6.0 | 7.3 | <0.0001 |
| Percentage with tangle dominant disease (NPFTDT9)a | 6.4 | 1.7 | 1.1 | 2.5 | <0.0001 |
| Percentage with FTLD-tau related pathologies or other tauopathies (NPFTDTAU)a | 26.2 | 19.7 | 23.0 | 23.2 | 0.058 |
| aEffective sample sizes for analyses of NPFTDT5, NPFTDT9, and NPFTDTAU | | | | | |

| **Supplemental Table 4** Select Alzheimer's disease neuropathologic changes (ADNC), stratified by cognitive status at initial visit, among participants with eventual autopsy-confirmed PSP (including MCI cases) | | | | | |
| --- | --- | --- | --- | --- | --- |
| Variable | Initial visit Normal | Initial visit MCI | Initial visit Dementia | Overall | P-value: initially Normal vs Dementia |
| **Sample size (n)** | **48** | **57** | **192** | **297** | N/A |
| % Female | 52.1 | 40.4 | 38 | 40.7 | 0.076 |
| % White | 97.9 | 94.7 | 95.8 | 96 | 0.69 |
| Age at initial visit (years) [SD] | 79.3 [8.7] | 73.2 [8.3] | 72.8 [8.1] | 73.9 [8.6] | <0.0001 |
| Age at death (years) [SD] | 89.6 [7.9] | 77.9 [9.6] | 76.2 [8.6] | 78.7 [9.9] | <0.0001 |
| # total visits (avg [SD]) | 8.0 [3.8] | 3.7 [2.0] | 2.8 [1.9] | 3.8 [3.0] | <0.0001 |
| % with initial visit only | 2.1 | 12.3 | 33.9 | 24.6 | <0.0001 |
| % dementia at last visit | 45.8 | 59.7 | 98.4 | 82.5 | <0.0001 |
| % with high level ADNCa | 5.3 | 7.7 | 11.6 | 9.5 | 0.36 |
| % with Thal A phase 5a | 12.2 | 7.3 | 11.3 | 10.7 | 0.88 |
| % with frequent neuritic amyloid plaques | 20.8 | 10.5 | 14.6 | 14.8 | 0.31 |
| % with Braak NFT stage 0 | 0.0 | 14.0 | 15.6 | 12.8 | <0.0001 |
| % with Braak NFT stage I | 0.0 | 10.5 | 16.1 | 12.5 |
| % with Braak NFT stage II | 12.5 | 22.8 | 15.6 | 16.5 |
| % with Braak NFT stage III | 20.8 | 12.3 | 10.9 | 12.8 |
| % with Braak NFT stage IV | 31.3 | 7.0 | 9.9 | 12.8 |
| % with Braak NFT stage V | 4.2 | 10.5 | 7.8 | 7.7 |
| % with Braak NFT stage VI | 8.3 | 3.5 | 9.4 | 8.1 |
| aeffective sample sizes: normal = 41, MCI = 41, dementia = 115 | | | | | |

| **Supplemental Table 5** Select clinical features of participants with autopsy-confirmed PSP, stratified by cognitive status at initial visit (including MCI cases) |
| --- |

| Variable | Initial visit Normal | Initial visit MCI | Initial visit Dementia | Overall | P-value: initially Normal vs Dementia |
| --- | --- | --- | --- | --- | --- |
| Persons with pathologic dx of PSP, n | **48** | **57** | **192** | **297** | N/A |
| Persons with pathologic dx of PSP, also with clinical dx of PSP, % (FINAL VISIT) | 8.3 | 40.4 | 48.4 | 40.4 | <0.0001 |
| Persons with pathologic dx of PSP, also with clinical dx of Parkinson dis., % (FINAL VISIT) | 12.5 | 5.3 | 3.7 | 5.4 | 0.026 |

| **Supplemental Table 6** Clinical features among participants with clinical data available related to PSP-associated symptoms, stratified by cognitive status at initial visit (including MCI cases) |
| --- |

| **Variable** | Initial visit Normal | Initial visit MCI | Initial visit Dementia | Overall | P-value: initially Normal vs Dementia |
| --- | --- | --- | --- | --- | --- |
| Persons with detailed clinical readouts of PSP, n | **435** | **244** | **481** | **1160** | N/A |
| Persons with detailed clinical readouts of PSP, also with pathologic dx of PSP, n | **22** | **17** | **34** | **73** | N/A |
| Persons with detailed clinical readouts of PSP, also with pathologic dx of PSP, % | 5.1 | 7 | 7.1 | 6.3 | 0.2 |
| Persons with detailed clinical readouts of PSP, also with pathologic dx of PSP: % with eye movement changes consistent with PSP (FINAL VISIT) | 4.5 | 58.8 | 47.1 | 37 | 0.0007 |
| Persons with detailed clinical readouts of PSP, also with pathologic dx of PSP:% with dysarthria consistent with PSP (FINAL VISIT) | 4.5 | 52.9 | 47.1 | 35.6 | 0.0007 |
| Persons with detailed clinical readouts of PSP, also with pathologic dx of PSP:% with axial rigidity consistent with PSP (FINAL VISIT) | 4.5 | 35.3 | 47.1 | 31.5 | 0.0007 |
| Persons with detailed clinical readouts of PSP, also with pathologic dx of PSP:% with gait disorder consistent with PSP (FINAL VISIT) | 4.5 | 35.3 | 47.1 | 31.5 | 0.0007 |
| Persons with detailed clinical readouts of PSP, also with pathologic dx of PSP:% with apraxia of speech (FINAL VISIT) | 4.5 | 29.4 | 29.4 | 21.9 | 0.036 |

**Supplemental Table 7** the 23 UK-ADRC PSP cases analyzed for digital pathology*

| Case # | Status | Years followed on study | Age at death | Sex | *APOE* genotype | Final CDR-GLOB | Interval CDR to death (months) | ADNC: CERAD Neuritic amyloid plaque score |
| --- | --- | --- | --- | --- | --- | --- | --- | --- |
| 1 | Incident | 17.9 | 84 | Female |  | 0.5 | 3 | No |
| 2 | Incident | 17.3 | 98 | Female |  | 1 | 96 | No |
| 3 | Incident | 19.0 | 90 | Female |  | 0 | 8 | No |
| 4 | Incident | 5.6 | 84 | Male |  | 0.5 | 14 | A = CERAD possible |
| 5 | Incident | 11.1 | 76 | Female |  | 2 | 2 | No |
| 6 | Incident | 22.7 | 93 | Male |  | 0.5 | 17 | No |
| 7 | Incident | 7.7 | 69 | Female |  | 0.5 | 3 | No |
| 8 | Prevalent | 8.0 | 86 | Male |  | 1 | 11 | A = CERAD possible |
| 9 | Prevalent | 9.9 | 89 | Female |  | 3 | 24 | No |
| 10 | Prevalent | 1 visit | 85 | Female |  | N/A | N/A | No |
| 11 | Prevalent | 1 visit | 75 | Male |  | 1 | 2 | No |
| 12 | Prevalent | 3.2 | 65 | Female |  | 0.5 | 36 | No |
| 13 | Prevalent | 1 visit | 67 | Male |  | N/A | N/A | B = CERAD probable |
| 14 | Prevalent | 9.5 | 89 | Male |  | 3 | 36 | B = CERAD probable |
| 15 | Prevalent | 4.9 | 67 | Female |  | 0.5 | 3 | No |
| 16 | Prevalent | 1.2 | 61 | Female |  | 0.5 | 36 | A = CERAD possible |
| 17 | Prevalent | 1 visit | 81 | Male |  | 1 | 20 | No |
| 18 | Prevalent | 1 visit | 79 | Female |  | N/A | N/A | C = Definite AD |
| 19 | Prevalent | 8.4 | 79 | Female |  | 3 | 48 | No |
| 20 | Prevalent | 1.5 | 63 | Female |  | 1 | 18 | A = CERAD possible |
| 21 | Prevalent | 1 visit | 70 | Male |  | 3 | 6 | No |
| 22 | Prevalent | 1.1 | 74 | Male |  | 3 | 6 | No |
| 23 | Prevalent | 4.2 | 87 | Female |  | 3 | 36 | No |

*-ADNC: Alzheimer’s disease neuropathologic change; APOE: Apolipoprotein E; CDR: Clinical Dementia Rating; CERAD: Consortium to Establish a Registry for Alzheimer’s Disease; PSP: progressive supranuclear palsy; UK-ADRC: University of Kentucky Alzheimer’s Disease Research Center

**Supplemental Fig. 1**


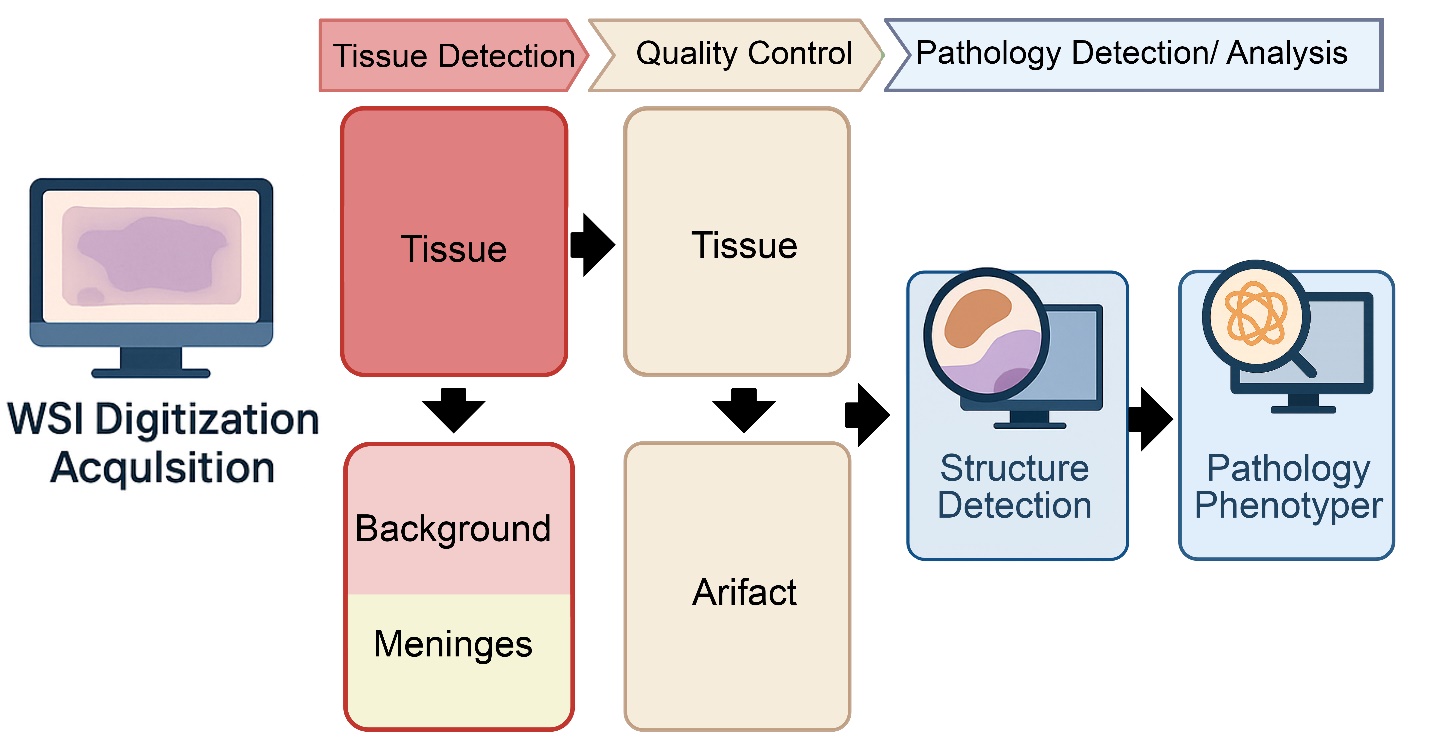


**Supplemental Fig. 1 Digital pathology workflow for automated detection and phenotyping of PSP- associated pathology**. This figure depicts the schematic overview of the automated pathology pipeline used to analyze digitized whole-slide images (WSIs). Following WSI acquisition, tissue-containing regions are identified and separated from background and meningeal tissue using a tissue detection DenseNet classifier. Tissue regions then undergo quality control to exclude artifacts such as tissue folds, staining artifacts and areas of poor focus, prior to downstream analysis. High-quality tissue areas are processed for structure detection and automated pathology phenotyping, enabling detection and quantification of disease-associated lesions across anatomically defined regions.

**Supplemental Fig. 2**

**
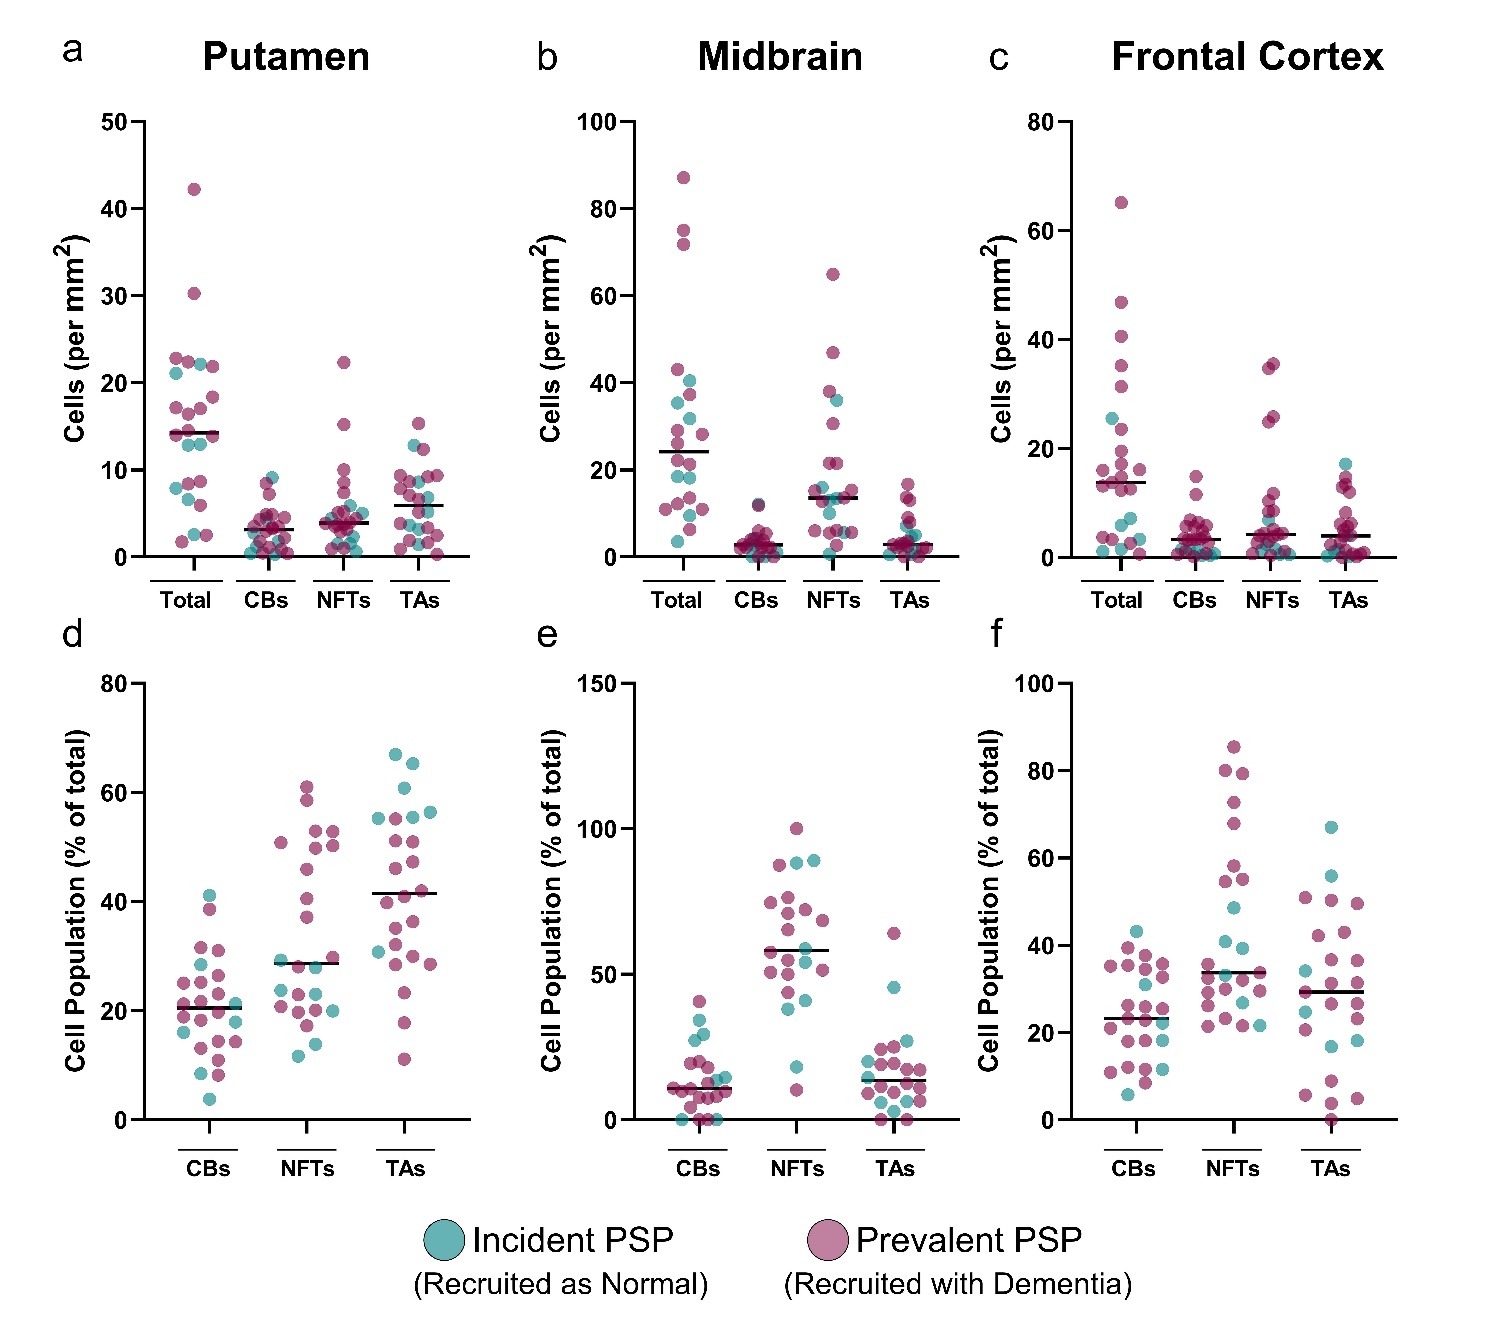
**

**Supplemental Fig. 2 Regional burden and composition of PSP-related tau pathologies in incident and prevalent PSP cases.** This figure shows the quantification of pTau pathology density across the putamen (a & d), midbrain (b & e), and frontal cortex (c & f) in incident and prevalent PSP cases. Turquoise points indicate incident PSP cases and maroon points indicate prevalent PSP cases. Panels a-c shows total lesion density and subtype-specific densities of coiled bodies (CBs), neurofibrillary tangles (NFTs), and tufted astrocytes (TAs), expressed as cells per mm², in the putamen, midbrain, and frontal cortex, respectively. Panels d-f show the proportional contribution of CBs, NFTs, and TAs to the total detected lesion population in each region. Horizontal bars indicate group means.
